# Supplementary material for: Polymer Capsules with Tunable Shell Thickness Synthesized via Janus-to-core shell Transition of Biphasic Droplets Produced in a Microfluidic Flow-Focusing Device
Source: PubMed Central journal article supplement (PMC7067790; doi:10.1038/s41598-020-61641-8), 2020-03-12
Supplement: 41598_2020_61641_MOESM1_ESM.pdf [file 41598_2020_61641_MOESM1_ESM.pdf]

# Polymer Capsules with Tunable Shell Thickness Synthesized via Janus-to-core shell Transition of Biphasic Droplets Produced in a Microfluidic Flow-Focusing Device

*Siyuan Xu<sup>a</sup>, Takasi Nisisako<sup>b\*</sup>*

<sup>a</sup> Department of Mechanical Engineering, School of Engineering, Tokyo Institute of Technology, Tokyo, Japan

<sup>b</sup> Laboratory for Future Interdisciplinary Research of Science and Technology (FIRST), Institute of Innovative Research, Tokyo Institute of Technology, R2-9, 4259 Nagatsuta-cho, Midori-ku, Yokohama, Kanagawa, 226-8503, Japan

\*To whom correspondence should be addressed.

## **Electronic Supplementary Information**

Email: [nisisako.t.aa@m.titech.ac.jp](mailto:nisisako.t.aa@m.titech.ac.jp)

## Supplementary figures

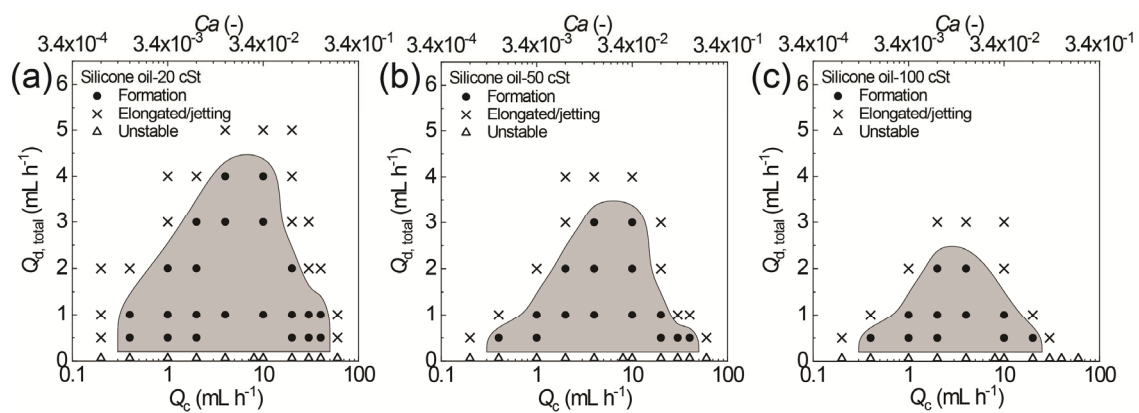

Figure S1 Flow pattern diagrams for producing biphasic droplets with different silicone oil viscosities: (a) 20 cSt; (b) 50 cSt; (c) 100 cSt.

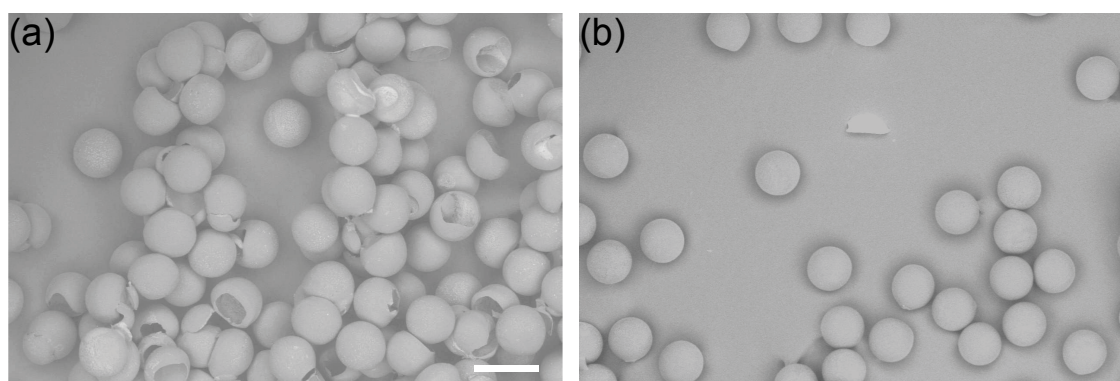

Figure S2 Particles obtained using different tube length (a) 5 cm, (b) 150 cm.  $Q_m:Q_s=1:1$ .  
 $Q_{d, total} = 1.0 \text{ mL h}^{-1}$ ,  $Q_c = 6.0 \text{ mL h}^{-1} \times 2$ . Scale bar: 200 μm.

### Supplemental Movie Caption

FF\_Janus01.mov: Movie clip of the formation of Janus droplets at a flow-focusing microfluidic geometry, recorded at 10,000 fps. Flow rates of monomer ( $Q_m$ ) and silicone oil ( $Q_s$ ) are  $Q_m = Q_s = 0.5 \text{ mL h}^{-1}$ . Flow rate of PVA aqueous phase ( $Q_c$ ) is  $Q_c = 6.0 \text{ mL h}^{-1} \times 2$ .

FF\_Janus02.mov: Movie clip of the formation of Janus droplets at a flow-focusing microfluidic geometry, recorded at 10,000 fps. Flow rates are  $Q_m = 0.1 \text{ mL h}^{-1}$ ,  $Q_s = 0.9 \text{ mL h}^{-1}$ , and  $Q_c = 6.0 \text{ mL h}^{-1} \times 2$ .

FF\_Janus03.mov: Movie clip of the formation of Janus droplets at a flow-focusing microfluidic geometry, recorded at 10,000 fps. Flow rates are  $Q_m = 0.2 \text{ mL h}^{-1}$ ,  $Q_s = 0.8 \text{ mL h}^{-1}$ , and  $Q_c = 6.0 \text{ mL h}^{-1} \times 2$ .
